# Supplementary material
Source: PubMed Central journal article supplement (PMC1544135)
Supplement: pnas_0604085103_10.pdf [file pnas_0604085103_10.pdf]

**Table 1. Effective Hill coefficients obtained by fitting the curves shown in Fig. 15 using a sigmoidal function.**

| Parameter  | Multiplied by | Hill coeff. |
|------------|---------------|-------------|
| –          | 1             | 23.3        |
| $\epsilon$ | 0.5           | 24.7        |
| $\epsilon$ | 2             | 21.5        |
| $\delta$   | 0.5           | 20.8        |
| $\delta$   | 2             | 25.7        |
| $A$        | 0.5           | 20.6        |
| $A$        | 2             | 20.8        |
| $B$        | 0.01          | 7.6         |
| $B$        | 0.25          | 10.9        |
| $B$        | 0.5           | 14.1        |
| $B$        | 2             | 68.1        |
| $B$        | 4             | 170.6       |
