# Supplementary material
Source: PubMed Central journal article supplement (PMC1544135)

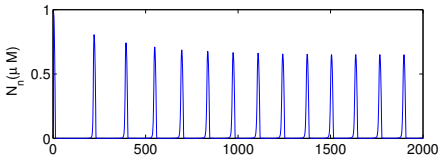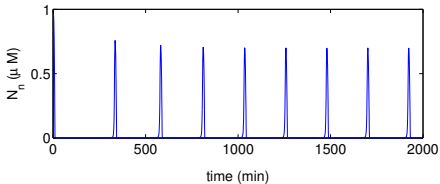

Supplement: pnas_0604085103_2.pdf [file pnas_0604085103_2.pdf]

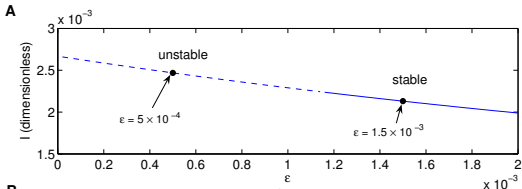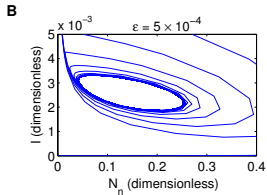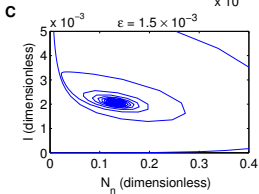

Supplement: pnas_0604085103_3.pdf [file pnas_0604085103_3.pdf]

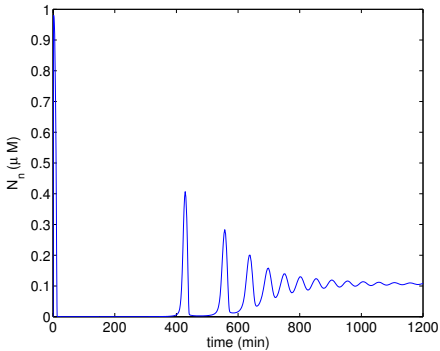

Supplement: pnas_0604085103_4.pdf [file pnas_0604085103_4.pdf]

**A.**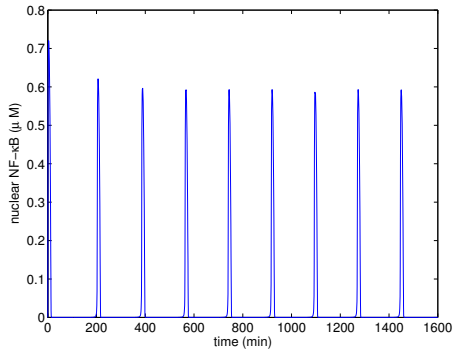**B.**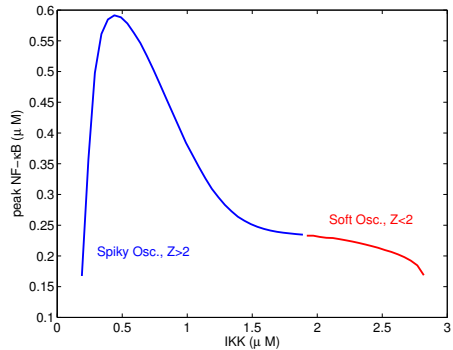

Supplement: pnas_0604085103_5.pdf [file pnas_0604085103_5.pdf]

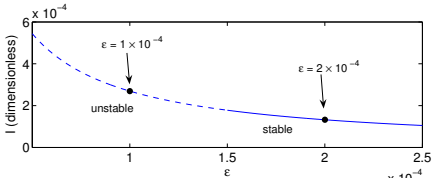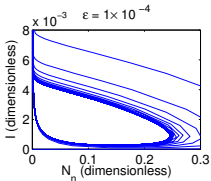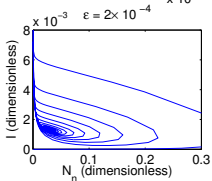

Supplement: pnas_0604085103_6.pdf [file pnas_0604085103_6.pdf]

**A.**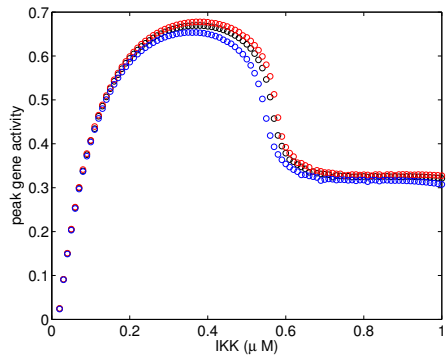**B.**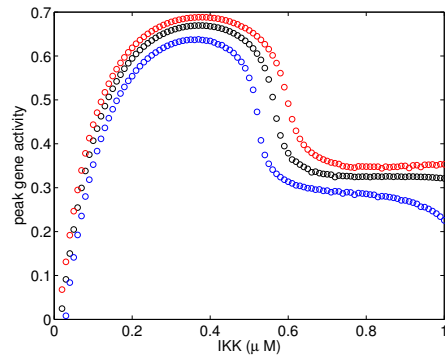**C.**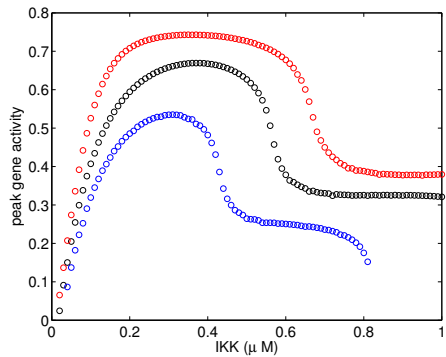**D.**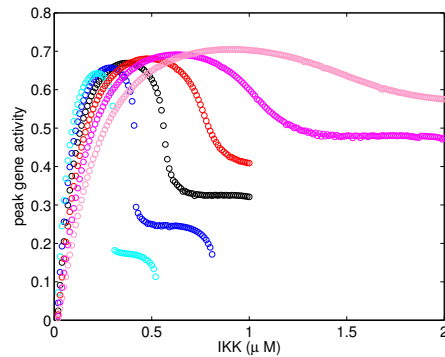

Supplement: pnas_0604085103_7.pdf [file pnas_0604085103_7.pdf]

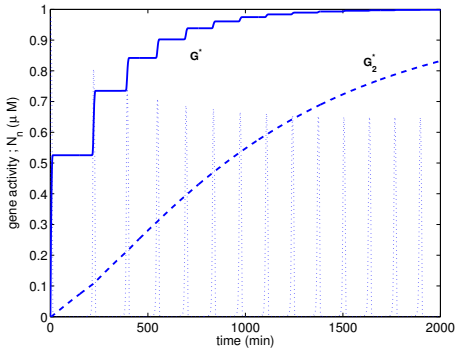

Supplement: pnas_0604085103_8.pdf [file pnas_0604085103_8.pdf]
